# Supplementary material for: Synthesis, crystal structures, photophysical, electrochemical studies, DFT and TD-DFT calculations and Hirshfeld analysis of new 2,2′:6′,2′′-terpyridine ligands with pendant 4′-(trimethoxyphenyl) groups and their homoleptic ruthenium complexes
Source: Royal Society of Chemistry journal article supplement (doi:10.1039/d0nj00046a), 2020-01-01
Supplement: d0nj00046a1.pdf [file d0nj00046a1.pdf]

**Synthesis, crystal structures, photophysical, electrochemical studies, DFT and TD-DFT calculations and Hirshfeld analysis of new 2,2':6',2''-terpyridine ligands with pendant 4'-(trimethoxyphenyl) and their homoleptic Ruthenium complexes**

<sup>1</sup>Golla Ramesh, <sup>1</sup>P. Raghavendra Kumar\*, <sup>2</sup>Manohar Pillegowda, <sup>2</sup>Ganga Periyasamy, <sup>1</sup>P. A. Suchetan, <sup>3</sup>R. J. Butcher, <sup>4</sup>Sabine Foro, <sup>5</sup>G. Nagaraju

<sup>1</sup>Department of Studies and Research in Chemistry, UCS, Tumkur University, Tumakuru, Karnataka-572103, India.

<sup>2</sup>Department of Chemistry, Jnana Bharathi Campus, Bangalore University, Bangalore 560 056, Karnataka, India.

<sup>3</sup>Department of Chemistry, Howard University, Washington DC, USA

<sup>4</sup>Institute of Materials Science, Darmstadt University of Technology, Alarich-Weiss-Str. 2, D-64287, Darmstadt, Germany.

<sup>5</sup>Department of Chemistry, Siddaganga Institute of Technology, Tumakuru, Karnataka-572103, India.

Corresponding author E-mail: [raghukp1@gmail.com](mailto:raghukp1@gmail.com), Mobile: +91-9901511112

---

**New Journal of Chemistry**

- 1. <sup>1</sup>H NMR Spectra**
- 2. <sup>13</sup>C NMR Spectra**
- 3. FT-IR spectra**
- 4. Computed bond parameters**

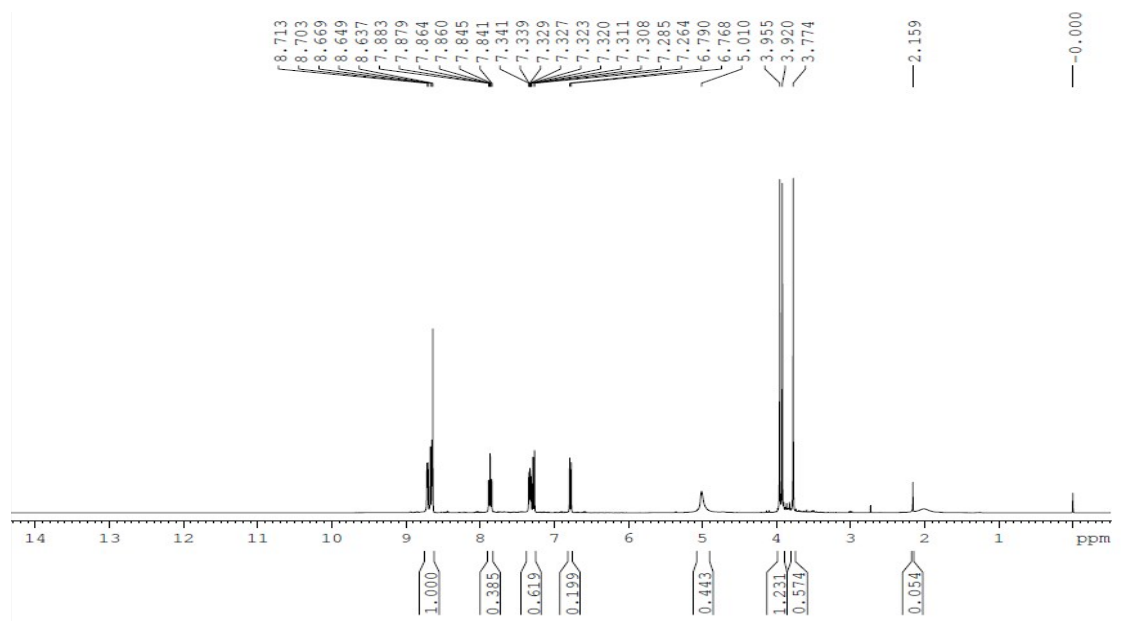

**Fig. S1**  $^1\text{H}$  NMR spectrum of ligand  $\text{L}^1$

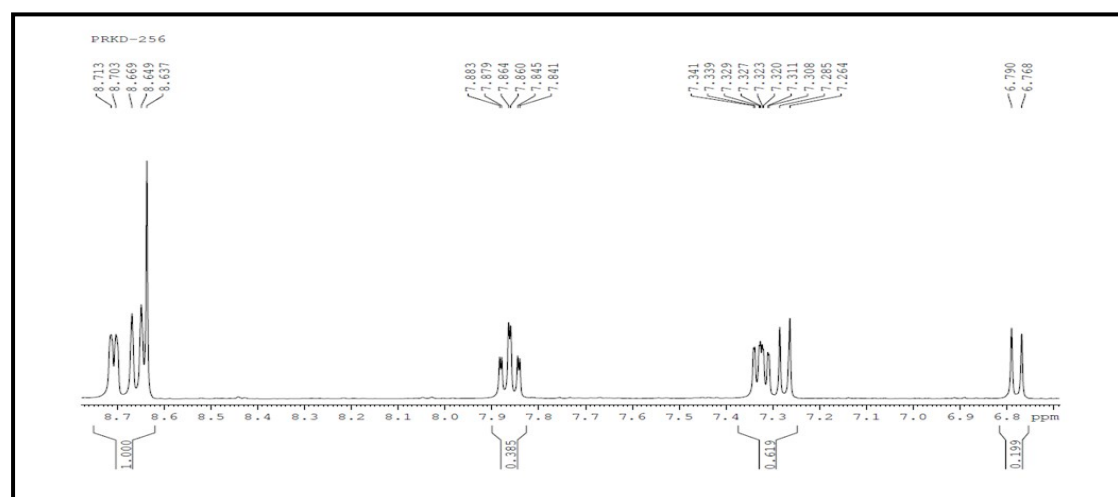

**Fig. S2** Expansion of  $^1\text{H}$  NMR spectrum of ligand  $\text{L}^1$

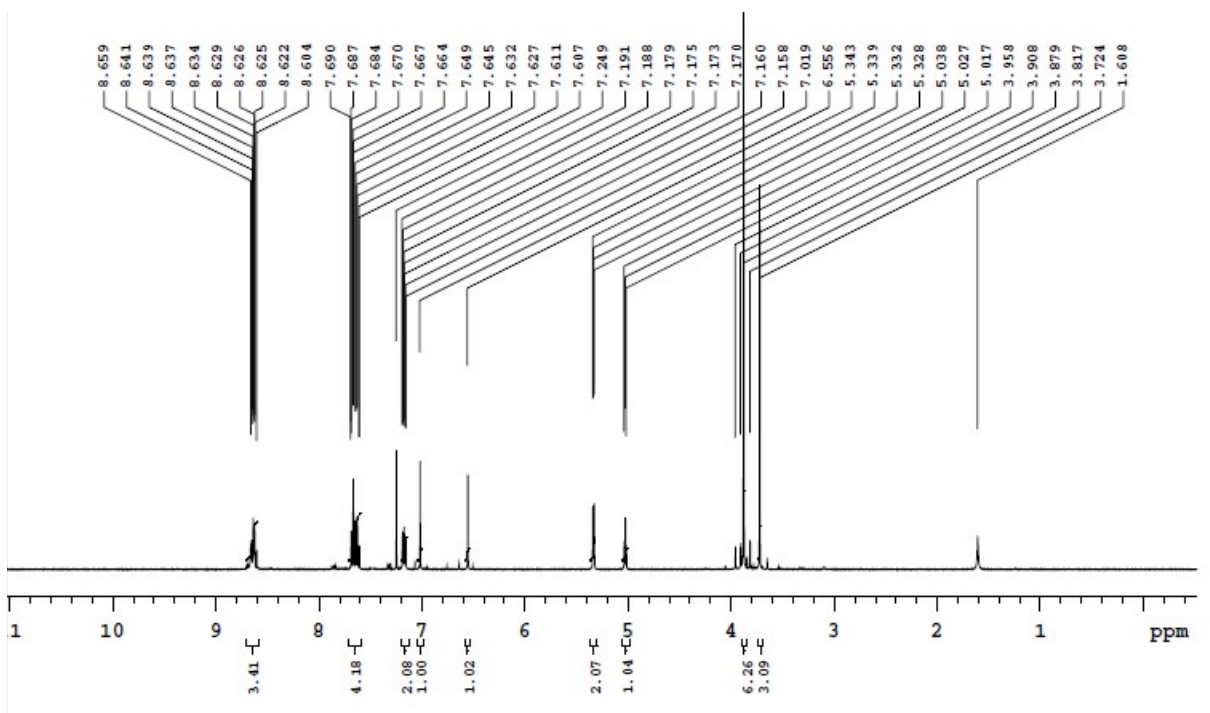

Fig. S3  $^1\text{H}$  NMR spectrum of ligand  $\text{L}^2$

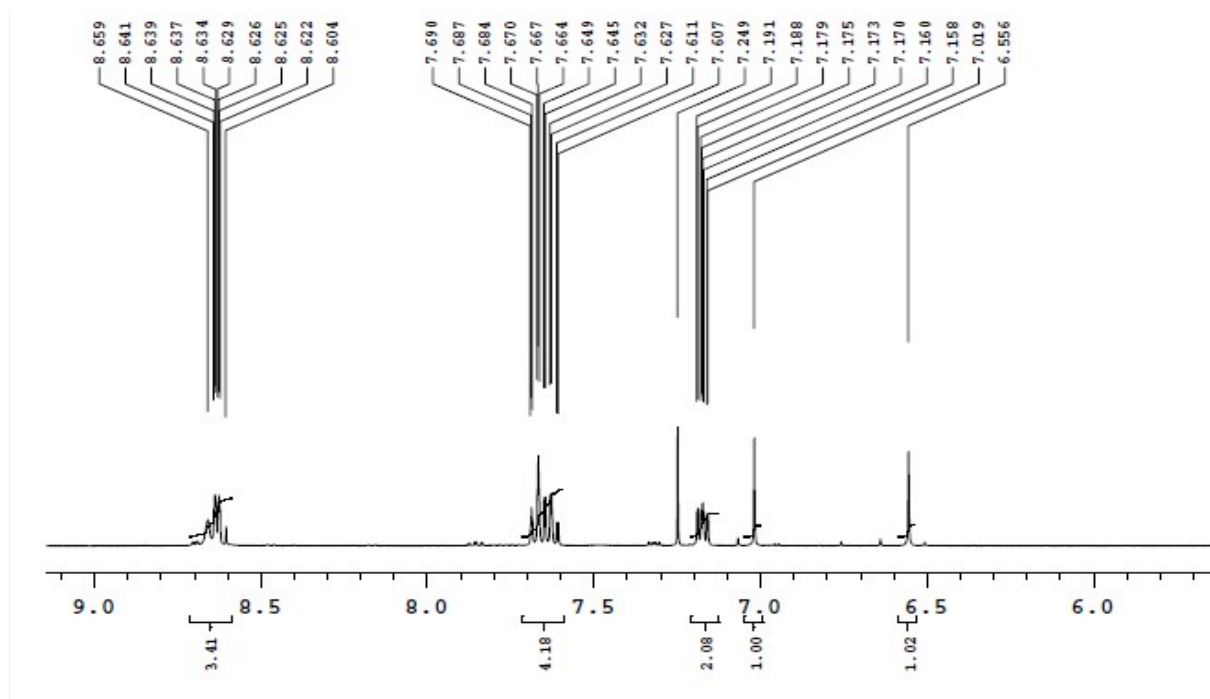

Fig. S4 Expansion of  $^1\text{H}$  NMR spectrum of ligand  $\text{L}^2$

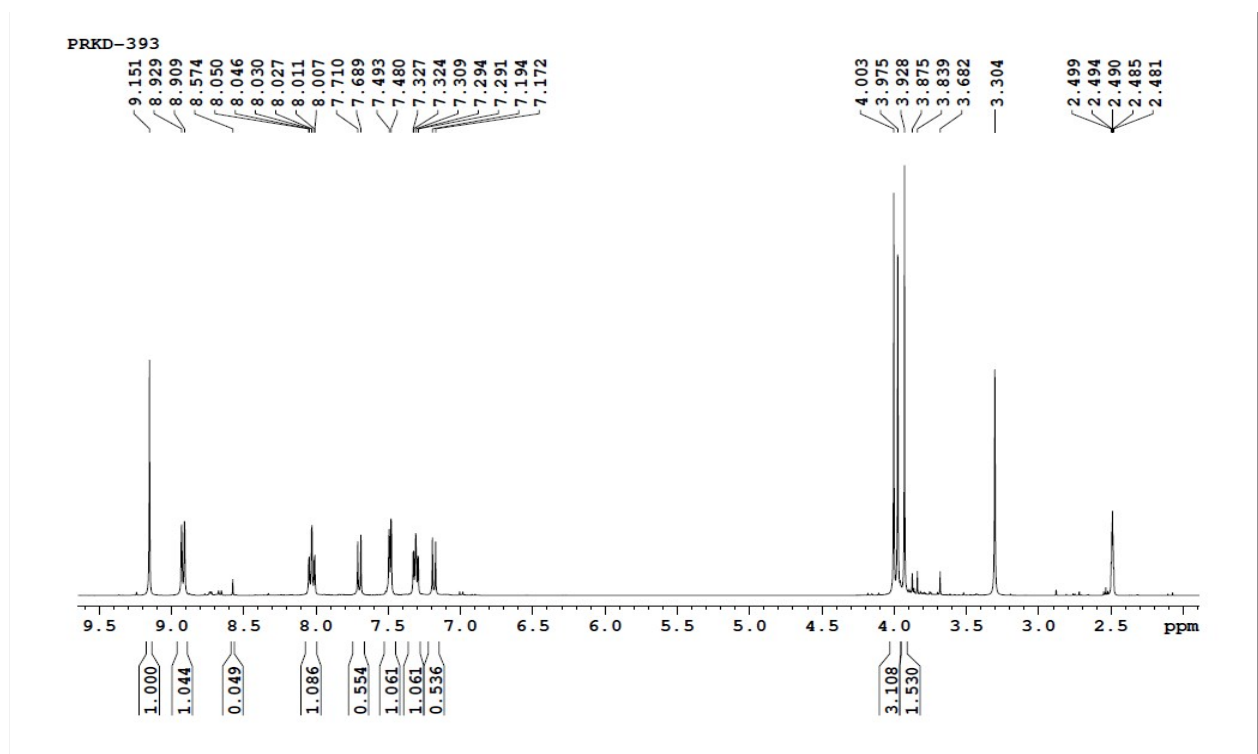

Fig. S5  $^1\text{H}$  NMR spectrum of complex  $[\text{Ru}(\text{L}^1)_2](\text{PF}_6)_2$  (**1**)

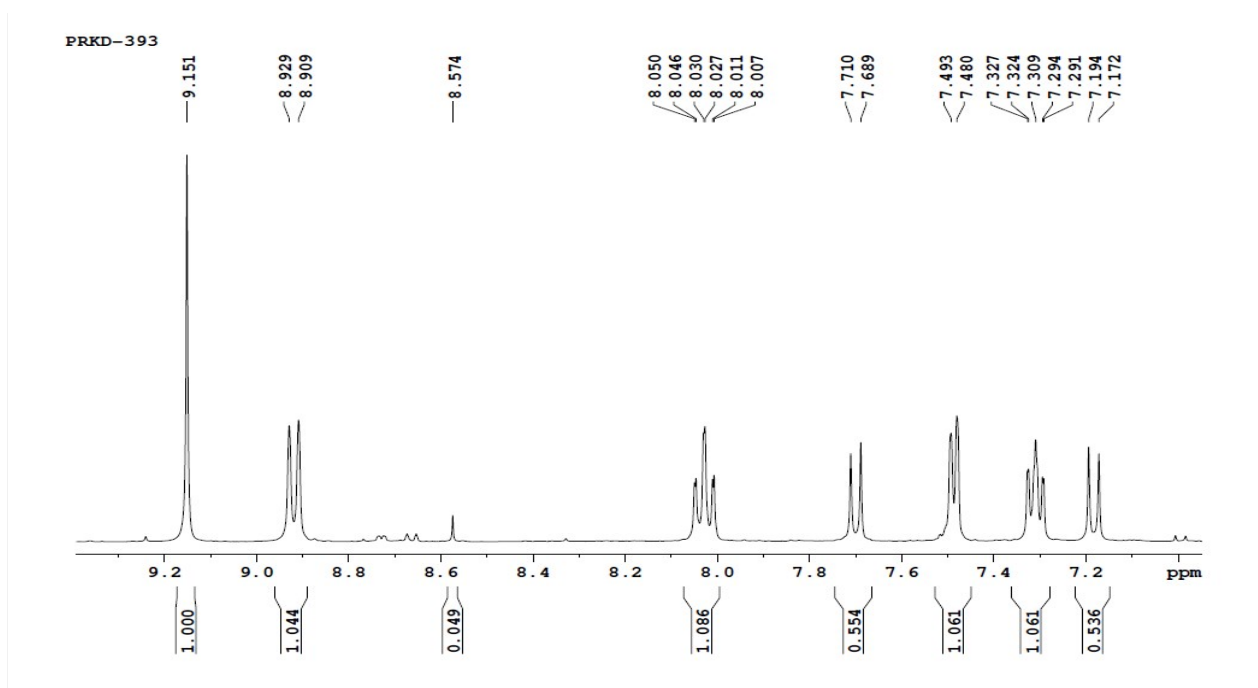

Fig. S6 Expansion  $^1\text{H}$  NMR spectrum of complex  $[\text{Ru}(\text{L}^1)_2](\text{PF}_6)_2$  (**1**)

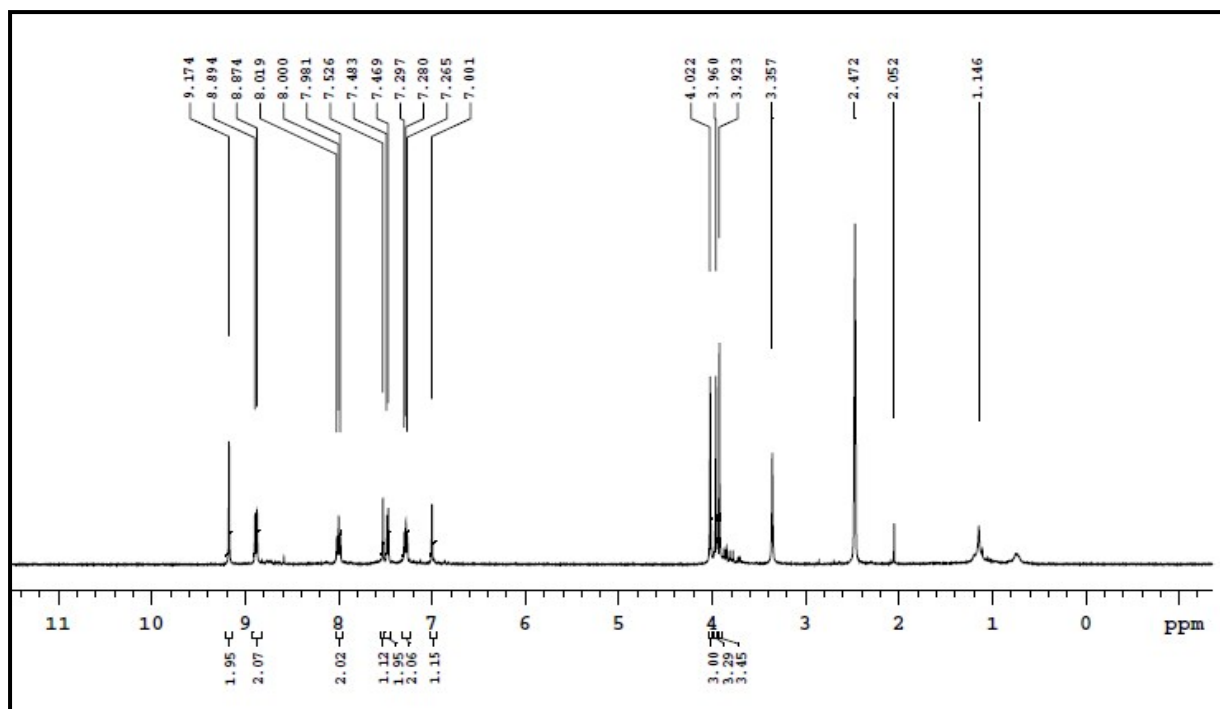

**Fig. S7** <sup>1</sup>H NMR spectrum of complex  $[\text{Ru}(\text{L}^2)_2](\text{PF}_6)_2$  (**2**)

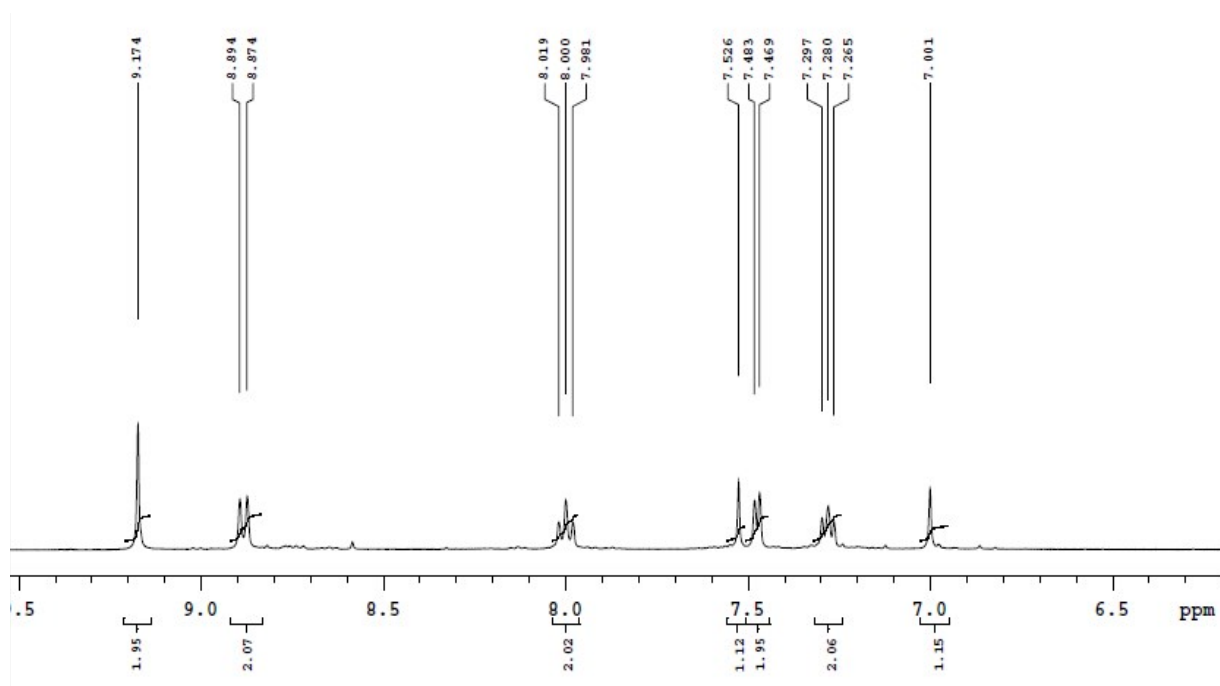

**Fig. S8** Expansion <sup>1</sup>H NMR spectrum of complex  $[\text{Ru}(\text{L}^2)_2](\text{PF}_6)_2$  (**2**)

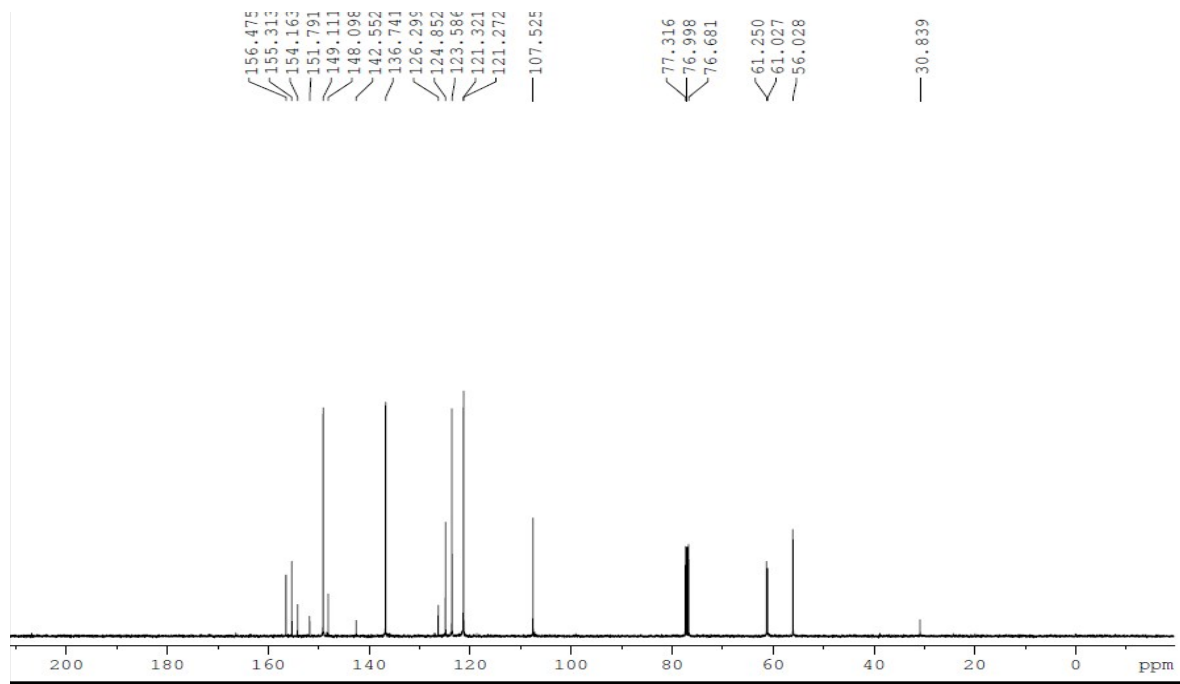

**Fig. S9**  $^{13}\text{C}\{^1\text{H}\}$  NMR spectrum of ligand L<sup>1</sup>

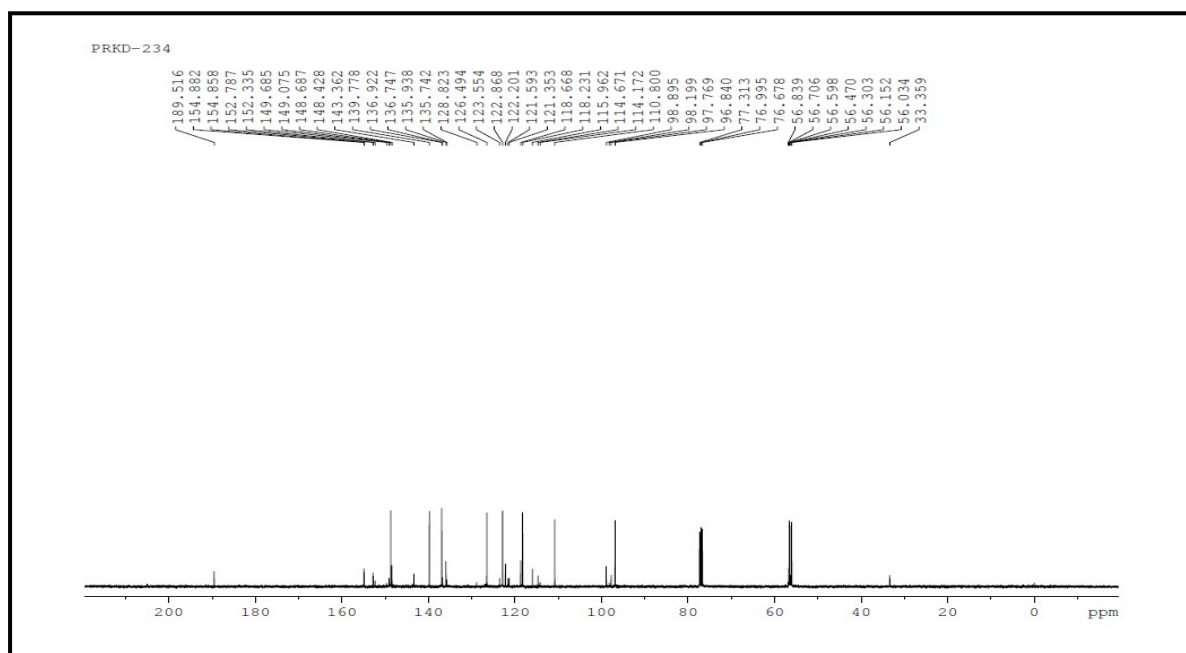

**Fig. S10**  $^{13}\text{C}\{^1\text{H}\}$  NMR spectrum of ligand L<sup>2</sup>

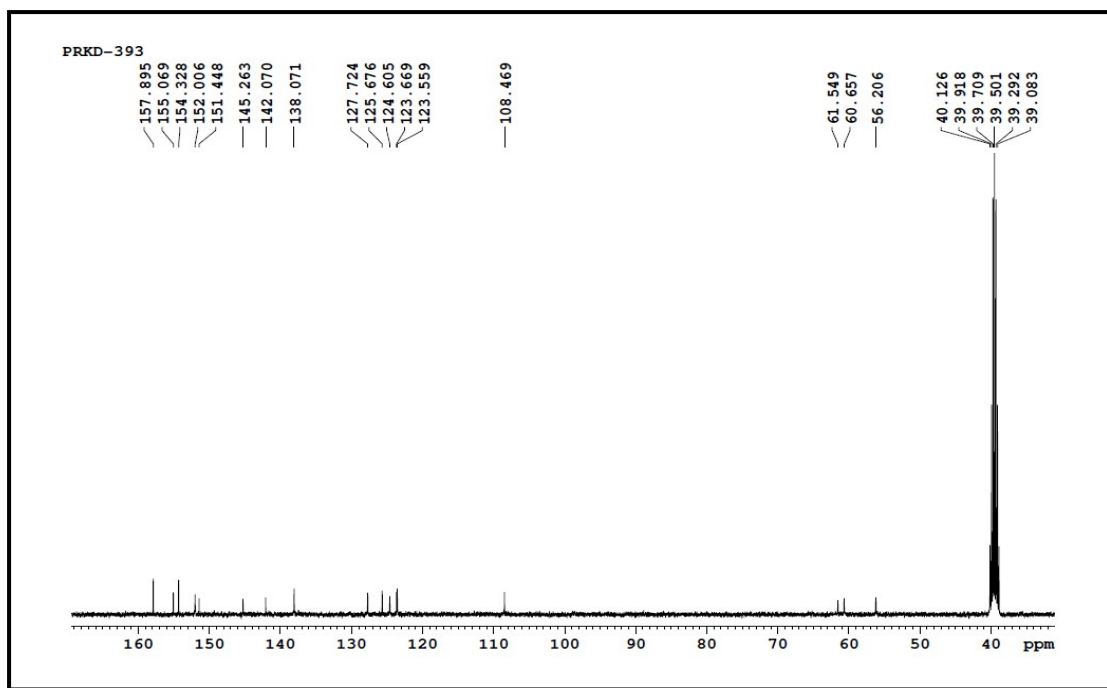

Fig. S11  $^{13}\text{C}\{^1\text{H}\}$  NMR spectrum of complex  $[\text{Ru}(\text{L}^1)_2](\text{PF}_6)_2$  (**1**)

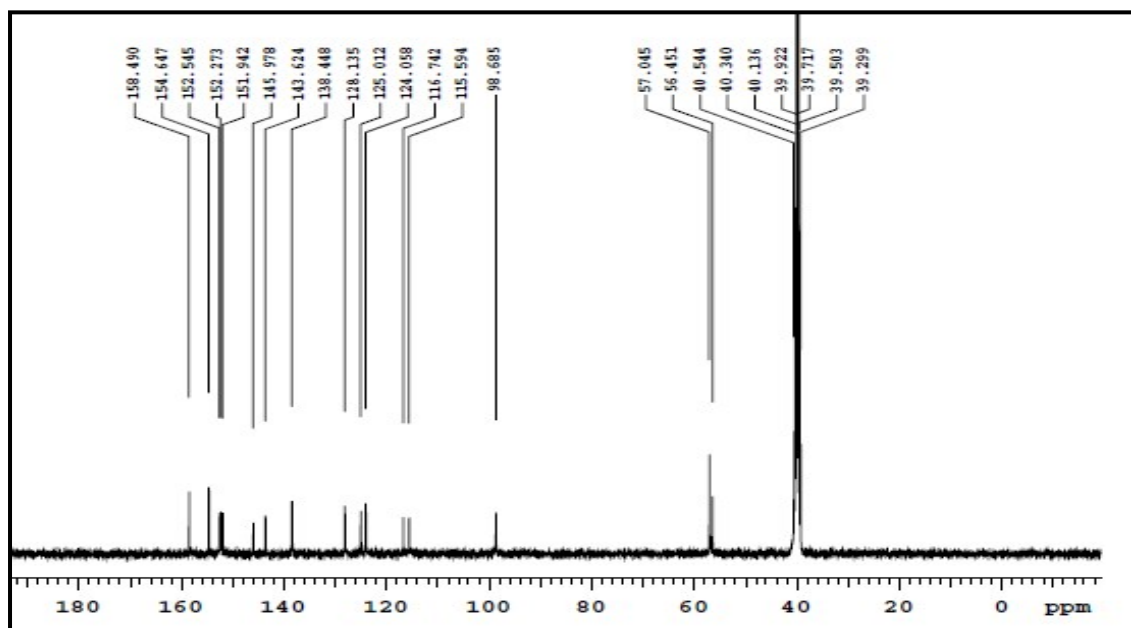

Fig. S12  $^{13}\text{C}\{^1\text{H}\}$  NMR spectrum of complex  $[\text{Ru}(\text{L}^2)_2](\text{PF}_6)_2$  (**2**)

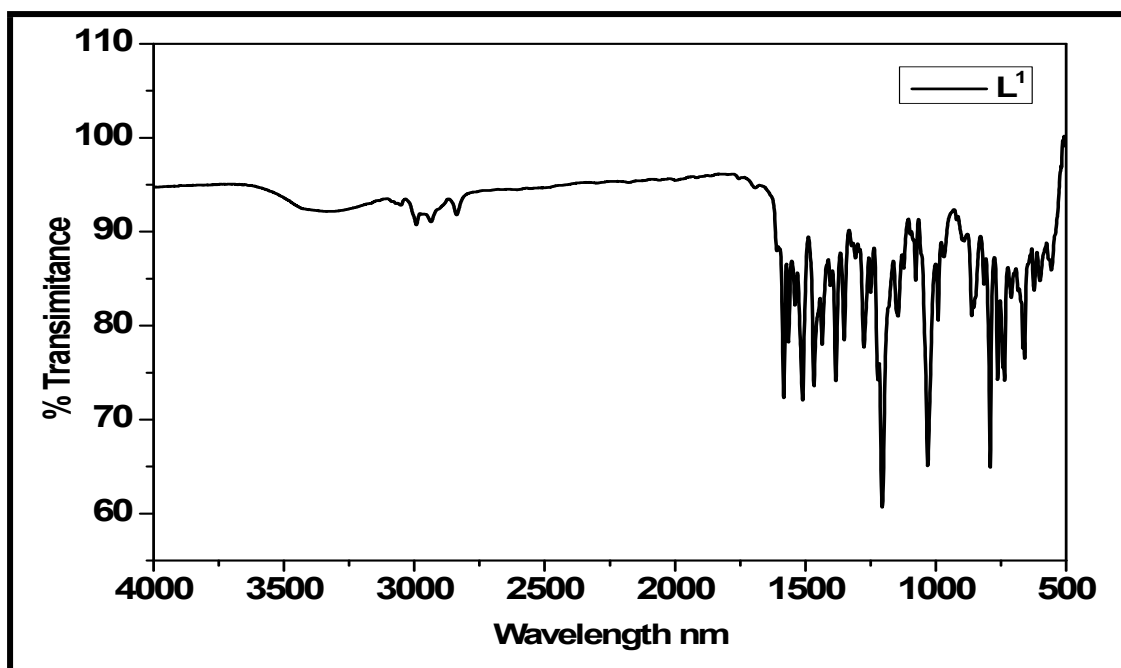

Fig. S13 FT-IR spectrum of ligand L<sup>1</sup>

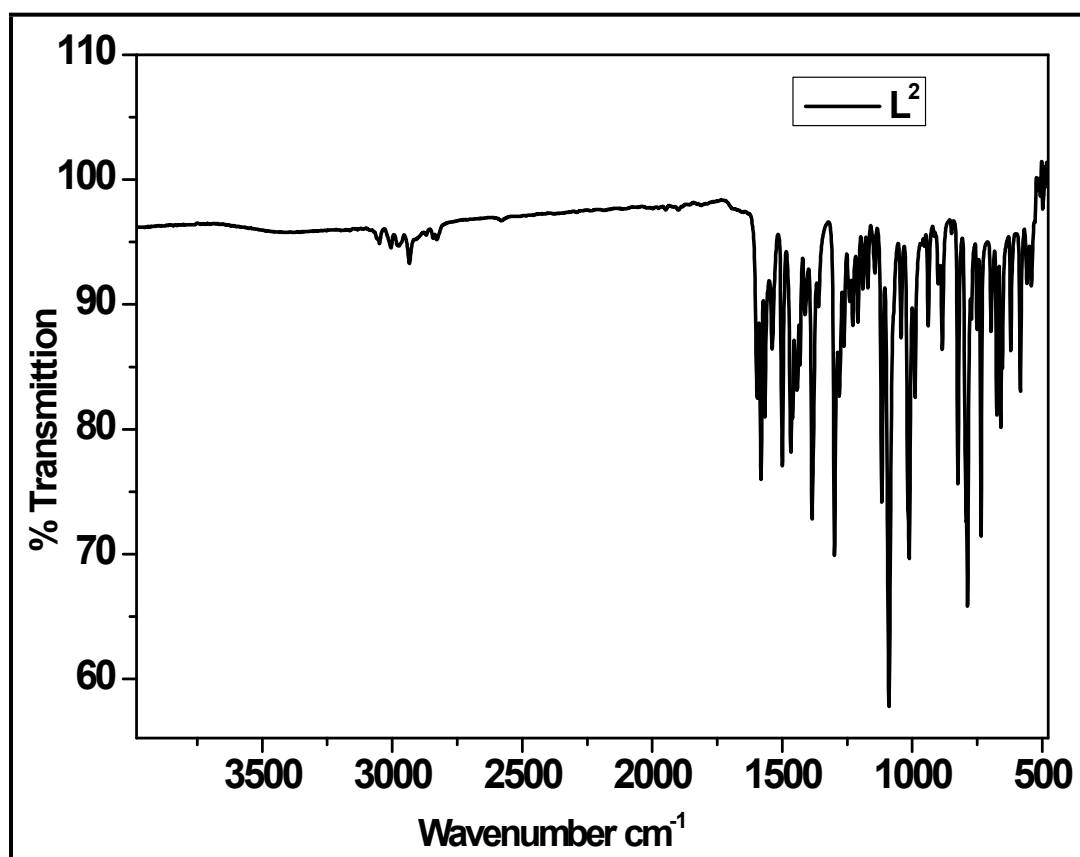

Fig. S14 FT-IR spectrum of ligand L<sup>2</sup>



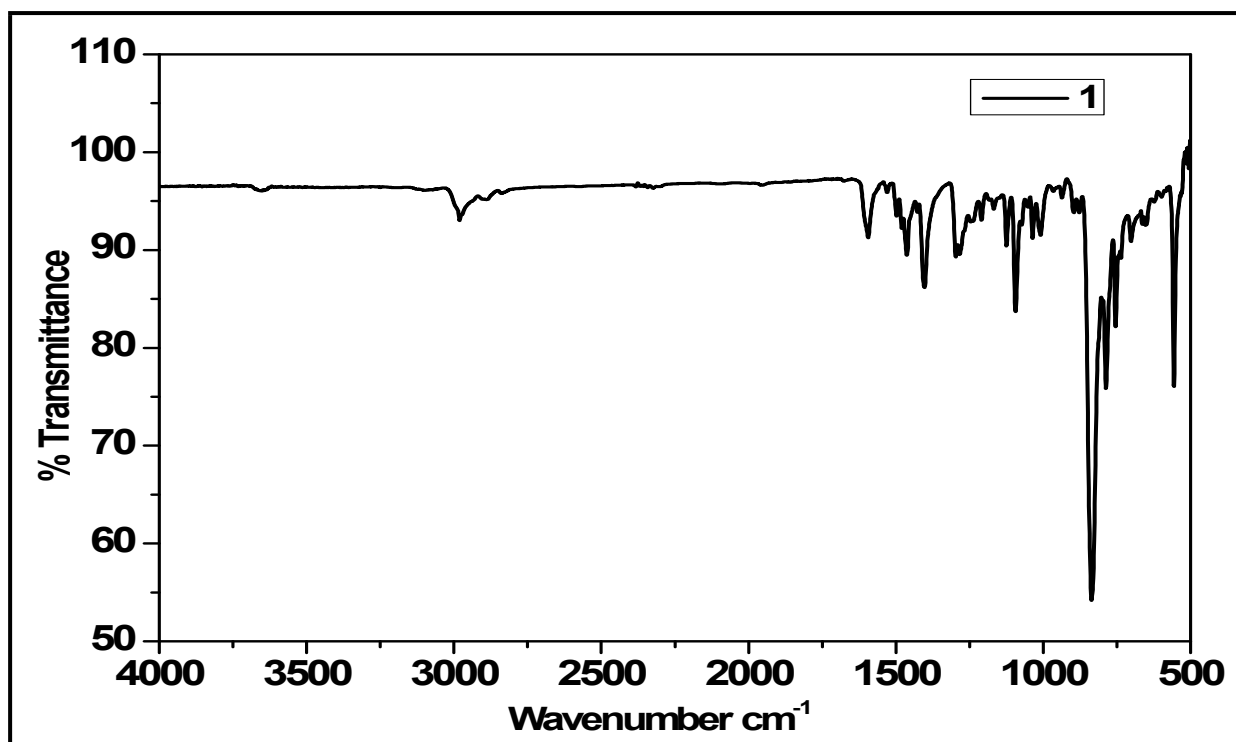

Fig. S15 FT-IR spectrum of complex [Ru(L<sup>1</sup>)<sub>2</sub>](PF<sub>6</sub>)<sub>2</sub> (1)

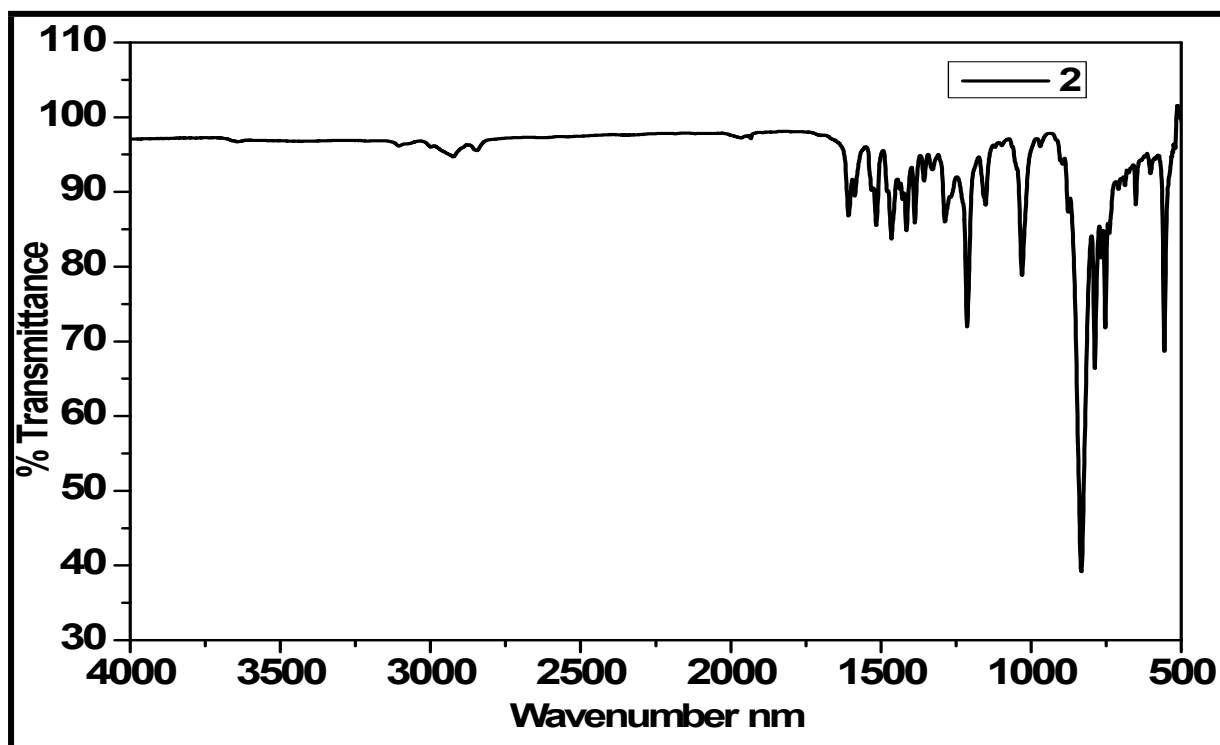

Fig. S16 FT-IR spectrum of complex [Ru(L<sup>2</sup>)<sub>2</sub>](PF<sub>6</sub>)<sub>2</sub> (2).

**Table S1** Experimental and Computed harmonic vibrational frequencies (FT-IR) in  $\text{cm}^{-1}$  of **L<sup>1</sup>**, **L<sup>2</sup>**, **1** and **2**.

| Compound                                                                               | ArC-H     | C=C/C=N   |
|----------------------------------------------------------------------------------------|-----------|-----------|
| <b>L<sup>1</sup></b>                                                                   | 2924      | 1471/1579 |
| Theoretical                                                                            | 3271-3198 | 1306-1703 |
| <b>L<sup>2</sup></b>                                                                   | 2924      | 1463/1591 |
| Theoretical                                                                            | 3271-3221 | 1306-1703 |
| [Ru( <b>L<sup>1</sup></b> ) <sub>2</sub> ](PF <sub>6</sub> ) <sub>2</sub> ( <b>1</b> ) | 2926      | 1467/1595 |
| Theoretical                                                                            | 3279-3221 | 1306-1703 |
| [Ru( <b>L<sup>2</sup></b> ) <sub>2</sub> ](PF <sub>6</sub> ) <sub>2</sub> ( <b>2</b> ) | 2925      | 1461/1599 |
| Theoretical                                                                            | 3211-3210 | 1302-1702 |

**Table S2** Experimental and computed photophysical properties and corresponding oscillator strength (f) of **L<sup>1</sup>**, **L<sup>2</sup>**, **1** and **2**.

| Compound                                                                               | $\pi - \pi^*$<br>H-2 to L<br>H-2 to L+1 | $\pi - \pi^*$<br>H-2 to L<br>H-2 to L+1 | <sup>1</sup> MLCT<br>H to L,<br>H-1 to L,<br>H-1 to L+1 | Oscillator<br>Strength (f) | $\Delta$ (eV) |
|----------------------------------------------------------------------------------------|-----------------------------------------|-----------------------------------------|---------------------------------------------------------|----------------------------|---------------|
| <b>L<sup>1</sup></b>                                                                   | 284                                     | 374                                     | --                                                      | 0.0015                     | 1.75          |
| Theoretical                                                                            | 276                                     | 350                                     |                                                         |                            |               |
| <b>L<sup>2</sup></b>                                                                   | 280                                     | 398                                     | --                                                      | 0.0087                     | 1.98          |
| Theoretical                                                                            | 270                                     | 375                                     |                                                         |                            |               |
| [Ru( <b>L<sup>1</sup></b> ) <sub>2</sub> ](PF <sub>6</sub> ) <sub>2</sub> ( <b>1</b> ) | 285                                     | 310                                     | 499                                                     | 0.7275                     | 5.17          |
| Theoretical                                                                            | 279                                     | 320                                     | 480                                                     |                            |               |
| [Ru( <b>L<sup>2</sup></b> ) <sub>2</sub> ](PF <sub>6</sub> ) <sub>2</sub> ( <b>2</b> ) | 286                                     | 311                                     | 495                                                     | 0.8371                     | 4.95          |
| Theoretical                                                                            | 274                                     | 318                                     | 482                                                     |                            |               |

**Table S3** Computed bond lengths (Å), bond angles (°) of compounds **L<sup>1</sup>** and **L<sup>2</sup>**.

| Bond Distance        | Bond Angle          | Bond Distance        | Bond Angle          |
|----------------------|---------------------|----------------------|---------------------|
| <b>L<sup>1</sup></b> |                     | <b>L<sup>2</sup></b> |                     |
| C5-N32 1.355         | C5-N32-C4 118.772   | C4-N31 1.354         | C5-N31-C4 120.455   |
| C5-C17 1.458         | C5-C1-C2 119.272    | C5-C31 1.321         | N31-C5-C1 121.367   |
| C4-C8 1.468          | C4-C3-N32 121.505   | C5-C1 1.411          | C5-C1-C2 118.776    |
| C8-N34 1.346         | C9-C11-C13 118.687  | C1-C2 1.415          | C1-C2-C3 118.542    |
| C19-N33 1.317        | C8-N34-C10 118.091  | C2-C26 1.439         | C2-C26-C36 120.991  |
| C2-C26 1.472         | C17-N33-C19 118.068 | C26-C36 1.391        | C26-N36-C28 121.404 |
| C26-C27 1.392        | C22-C20-C18 118.458 | C28-O47 1.294        | C28-O47-O48 122.025 |
| C26-C38 1.437        | C29-C30-C28 119.544 | C48-O47 1.456        | C28-C30-O35 124.383 |
| C38-C28 1.372        | C43-O36-C29 129.034 | C48-H50 1.087        | C30-O35-C41 130.607 |
| C27-C29 1.421        | C27-O35-C39 120.427 | C28-C30 1.498        | C27-O34-C37 122.136 |
| C29-C30 1.468        | C47-O37-C30 121.536 | C30-O35 1.286        | C19-N32-C17 117.984 |
| C27-O35 1.340        | H50-C47-O37 109.443 | C27-O34 1.294        | N32-C19-C22 123.066 |
| C29-O36 1.301        | H49-C47-O37 104.912 | C37-H38 1.091        | C19-C22-C20 118.603 |
| C30-O37 1.303        | H48-C47-O37 109.495 |                      | C20-C18-C17 118.257 |
| O35-C39 1.446        |                     |                      | C5-C17-C32 115.344  |
| O36-C43 1.450        |                     |                      | C4-C8-N33 115.627   |
| O37-C43 1.453        |                     |                      | C27-C26-C36 117.633 |

**Table S4** Computed bond lengths (Å), bond angles (°) of compounds **1** and **2**.

| Bond Distance (r <sub>Ru-N</sub> )                                     | Bond Angle (<N-Ru-N>) | Bond Distance (r <sub>Ru-N</sub> )                                     | Bond Angle (<N-Ru-N>) |
|------------------------------------------------------------------------|-----------------------|------------------------------------------------------------------------|-----------------------|
| <b>[Ru(L<sup>1</sup>)<sub>2</sub>](PF<sub>6</sub>)<sub>2</sub> (1)</b> |                       | <b>[Ru(L<sup>2</sup>)<sub>2</sub>](PF<sub>6</sub>)<sub>2</sub> (2)</b> |                       |
| Ru68-N69 2.124                                                         | N69-Ru68-N33 156.538  | Ru66-N63 2.016                                                         | N64-Ru66-N63 78.247   |
| Ru68-N32 2.016                                                         | N66-Ru68-N67 156.620  | Ru66-N65 2.123                                                         | N64-Ru66-N65 156.491  |
| Ru68-N33 2.122                                                         | N32-Ru68-N69 79.195   | Ru66-N32 2.122                                                         | N65-Ru66-N63 78.244   |
| Ru68-N66 2.122                                                         | N33-Ru68-N32 78.344   | Ru66-N67 2.122                                                         | N32-Ru66-N31 78.294   |
| Ru68-N65 2.016                                                         | N66-Ru68-N65 78.329   | Ru66-N31 2.016                                                         | N31-Ru66-N67 78.252   |
| Ru68-N67 2.122                                                         | N65-Ru68-N67 78.292   | Ru66-N32 2.122                                                         | N67-Ru66-N32 156.546  |
|                                                                        | N65-Ru68-N69 101.696  |                                                                        | N32-Ru66-N63 101.852  |
|                                                                        | N66-Ru68-N69 92.525   |                                                                        | N65-Ru66-N32 92.334   |

**Table S5** Torsional angles (°) in the crystal structures of ligands (**L<sup>1</sup>** and **L<sup>2</sup>**) and complexes (**1** and **2**).

| <b>L<sup>1</sup></b> | <b>Experimental</b> | <b>Theoretical</b> | <b>1</b>        | <b>Experimental<br/>Ru complex A</b> | <b>Theoretical<br/>Ru complex A</b> |                 | <b>Experimental<br/>Ru complex A'</b> | <b>Theoretical<br/>Ru complex A'</b> |
|----------------------|---------------------|--------------------|-----------------|--------------------------------------|-------------------------------------|-----------------|---------------------------------------|--------------------------------------|
| N1/C10/C17/N3        | -164.77             | 178.10             | N2/C10/C11/N3   | -0.2                                 | -0.58                               | N5/C30/C29/N4   | 6.2                                   | -0.010                               |
| N1/C10/C17/C21       | 15.95               | -2.157             | N2/C6/C5/N1     | 1.1                                  | 0.24                                | N6/C35/C34/N5   | -8.9                                  | 0.24                                 |
| N1/C9/C12/N2         | -173.64             | -179.15            | O2/C20/C21/O3   | -0.3                                 | 2.17                                | C36/C35/C34/C33 | -13.9                                 | -0.017                               |
| N3/C18/C19/C20       | -1.5                | 0.002              | O2/C20/C19/O1   | -4.0                                 | -2.41                               | C25/C26/C27/C28 | 9.8                                   | 0.01                                 |
| N2/C12/C13/C14       | 0.6                 | 0.248              | C17/C16/C8/C9   | 39.2                                 | -40.02                              | C31/C32/C40/C45 | -1.9                                  | 36.05                                |
| C1/C6/C7/C11         | 39.67               | 29.138             | C9/C10/C11/C12  | -0.2                                 | -0.32                               | O4/C41/C42/O5   | -5.5                                  | -4.512                               |
| C5/C6/C7/C8          | 36.85               | 32.11              | N3/C15/C14/C13  | 0.4                                  | -0.111                              | O5/C42/C43/O6   | 4.6                                   | 3.332                                |
| O2/C2/C3/O3          | -0.95               | 3.14               | N1/C5/C6/N2     | 1.1                                  | 0.24                                | N6/C39/C38/C37  | -0.4                                  | 0.03                                 |
| C24/O3/C3/C4         | 68.42               | 0.665              |                 |                                      |                                     | N4/C25/C26/C27  | -0.2                                  | -0.025                               |
| O2/C3/C4/C5          | -177.64             | -3.118             |                 |                                      |                                     |                 |                                       |                                      |
| C2/C1/O1/C22         | -3.01(2)            | -58.23             |                 |                                      |                                     |                 |                                       |                                      |
| C2/C3/O2/C23         | 7.1(2)              | 2.93               |                 |                                      |                                     |                 |                                       |                                      |
| C5/C4/O3/C24         | -114.90             | 179                |                 |                                      |                                     |                 |                                       |                                      |
| <b>L<sup>2</sup></b> | <b>Experimental</b> | <b>Theoretical</b> | <b>2</b>        | <b>Experimental<br/>Ru complex A</b> | <b>Theoretical<br/>Ru complex A</b> |                 | <b>Experimental<br/>Ru complex B</b>  | <b>Theoretical<br/>Ru complex B</b>  |
| N1/C10/C17/N3        | 178.81              | 178.94             | N3/C11/C10/N2   | -3.1                                 | 0.062                               | N2/C10/C11/N3   | 1.3                                   | 0.048                                |
| N1/C10/C17/C21       | 0.8                 | 179.26             | N1/C5/C6/N2     | -1.3                                 | 0.396                               | C8/C9/C10/N2    | -1.1                                  | -0.143                               |
| N1/C9/C12/N2         | -170.6              | 177.24             | C4/C5/C6/C7     | -0.5                                 | 0.167                               | N2/C6/C5/N1     | -5.0                                  | -0.54                                |
| N3/C17/C10/C11       | -0.2                | -0.504             | C7/C8/C16/C21   | 126.6                                | 37.44                               | N1/C5/C4/C3     | -2.7                                  | -0.003                               |
| N2/C13/C14/C15       | 1.0                 | 0.056              | N3/C11/C12/C13  | -0.3                                 | -0.02                               | C7/C6/C5/C4     | -5.9                                  | -0.174                               |
| C1/C6/C7/C11         | -40.1               | 35.93              | C16/C17/C18/C19 | -0.1                                 | -1.3                                | N1/C1/C2/C3     | 0.2                                   | 0.000                                |
| C5/C6/C7/C8          | -38.1               | 28.70              | O1/C18/C19/O2   | 5.9                                  | -1.194                              | N3/C15/C14/C13  | 0.3                                   | 0.046                                |
| O2/C3/C4/O3          | 0.5                 | -0.50              | C20/C19/O2/C23  | 1.3                                  | -138.08                             | C17/C16/C8/C7   | -41.0                                 | -35.93                               |
| O1/C1/C6/C7          | 1.0                 | 12.55              | C12/C11/C10/C9  | -4.8                                 | -0.589                              | C22/O1/C17/C18  | -16.9                                 | 5.407                                |
| C22/O1/C1/C2         | 77.6                | 2.45               | N3/C15/C14/C13  | 0.9                                  | -0.020                              | O3/C20/C19/O2   | -2.8                                  | 3.49                                 |
| C11/C10/N1/C9        | 1.5                 | -0.69              |                 |                                      |                                     | C20/C21/C16/C17 | 1.5                                   | 0.787                                |
| C6/C1/O1/C22         | 102.4               | 179.502            |                 |                                      |                                     |                 |                                       |                                      |
| C1/C2/O2/C23         | 113.4               | 177.64             |                 |                                      |                                     |                 |                                       |                                      |
| C2/C3/O3/C24         | -179.71             | 0.313              |                 |                                      |                                     |                 |                                       |                                      |
